# Supplementary material for: Biomass-derived N-doped porous carbon: an efficient metal-free catalyst for methylation of amines with CO2
Source: Royal Society of Chemistry journal article supplement (doi:10.1039/c9gc03277k), 2019-01-01
Supplement: c9gc03277k1.pdf [file c9gc03277k1.pdf]

## Supplementary Information

### **Biomass-Derived N-Doped Porous Carbon: An Efficient Metal-free Catalyst for Methylation of Amines with CO<sub>2</sub>**

Feiying Tang,<sup>a</sup> Liqiang Wang,<sup>\*a,b</sup> and You-Nian Liu<sup>\*a,b</sup>

<sup>a</sup> College of Chemistry and Chemical Engineering, Central South University, Changsha, Hunan 410083, P.R. China.

<sup>b</sup> State Key Laboratory of Powder Metallurgy, Central South University, Changsha, Hunan 410083, P.R. China.

\*Corresponding Authors: E-mail addresses: [liqiangwang@csu.edu.cn](mailto:liqiangwang@csu.edu.cn) (L. Wang) and [liuyounian@csu.edu.cn](mailto:liuyounian@csu.edu.cn) (Y.-N. Liu). Phone/Fax: +86-731-8887-9616.

## Contents

### 1. Experimental

Materials.

Preparation of Catalysts.

Characterization of Catalysts.

Evaluation of catalytic performance.

Computational method and model.

### 2. Schemes

**Scheme S1.** Catalytic reaction of primary amine with CO<sub>2</sub> by using HPC<sub>(1/5)</sub>.

**Scheme S2.** Proposed reaction pathway for CO<sub>2</sub> conversion.

### 3. Figures

**Fig. S1.** The interaction of CO<sub>2</sub> with pyridinic N and pyrrolic N, respectively.

**Fig. S2.** Hirshfeld charge population analysis results of N-species on various simulated NPC models.

**Fig. S3.** XRD patterns of NPC<sub>(1/2)</sub>, NPC<sub>(1/3)</sub>, NPC<sub>(1/5)</sub> and NPC<sub>(1/7)</sub>.

**Fig. S4.** TEM images of a) NPC<sub>(1/2)</sub>, b) NPC<sub>(1/3)</sub>, c) NPC<sub>(1/5)</sub> and d) NPC<sub>(1/7)</sub>.

**Fig. S5.** SEM images of a) NPC<sub>(1/2)</sub>, b) NPC<sub>(1/3)</sub>, c) NPC<sub>(1/5)</sub> and d) NPC<sub>(1/7)</sub>. e) SEM image of NPC<sub>(1/5)</sub> and the corresponding EDX mapping images of f) C and g) N elements. Scale bar: 200 nm.

**Fig. S6.** XPS survey spectra of NPC<sub>(1/2)</sub>, NPC<sub>(1/3)</sub>, NPC<sub>(1/5)</sub> and NPC<sub>(1/7)</sub>.

**Fig. S7.** C 1s XPS spectra of NPC<sub>(1/2)</sub>, NPC<sub>(1/3)</sub>, NPC<sub>(1/5)</sub> and NPC<sub>(1/7)</sub>.

**Fig. S8.** a) N<sub>2</sub> Adsorption (filled symbols)/desorption (empty symbols) isotherms and

b) Pore size distribution for NPC<sub>(1/2)</sub>, NPC<sub>(1/3)</sub>, NPC<sub>(1/5)</sub> and NPC<sub>(1/7)</sub>.

**Fig. S9.** a) CO<sub>2</sub> adsorption (273 K and 298 K) and b) heat of adsorption of NPC<sub>(1/2)</sub>, NPC<sub>(1/3)</sub>, NPC<sub>(1/5)</sub> and NPC<sub>(1/7)</sub>.

**Fig. S10.** The HPLC spectra of N-methylaniline, N, N-dimethylaniline, N-methylformanilide and the mixture under reaction.

**Fig. S11.** The kinetic data on the methylation reaction over NPC<sub>(1/5)</sub>.

**Fig. S12.** XPS analysis on NPC<sub>(1/5)</sub> before and after the reaction.

**Fig. S13.** Optimized initial state (I), transition state (TS) and final state (F) structures involved in step i. Some selected distances are given in Å.

**Fig. S14.** Optimized initial state (I), transition state (TS) and final state (F) structures involved of step ii. Some selected distances are given in Å.

**Fig. S15.** Optimized initial state (I), transition state (TS) and final state (F) structures involved of step iii. Some selected distances are given in Å.

**Fig. S16.** Optimized initial state (I), transition state (TS) and final state (F) structures involved of step iv. Some selected distances are given in Å.

#### **4. Tables**

**Table S1.** Summary of N 1s XPS results for NPC samples.

**Table S2.** Summary of surface areas and pore volumes for all NPC samples.

**Table S3.** Catalytic performance of NPC<sub>(1/5)</sub> in different solvents.

**Table S4.** The Methylation reaction of N-methylaniline with CO<sub>2</sub> over our proposed NPC catalysts and recently documented homogenous catalyst.

**Table S5.** Summary of N 1s XPS results for NPC<sub>(1/5)</sub> before and after reaction.

## 1. Experimental

**Materials.** All chemicals in this work were purchased from Titan Technology Co. Ltd. (Shanghai, China). All chemicals were of analytical grade without further purification.

**Preparation of Catalysts.** Nitrogen-doped porous carbon (NPC) was synthesized as follows: first, the tannic acid and urea were dissolved into water (the mass ratios of tannic acid to urea were kept at 1:2, 1:3, 1:5 and 1:7), followed by drying at 75 °C. The obtained solid was moved into a tubular furnace for pyrolysis under N<sub>2</sub> flow (80 mL min<sup>-1</sup>). The sample was firstly heated to 600 °C at a heating rate of 2 °C min<sup>-1</sup> and maintained for 1 h, then heated to 900 °C at 2 °C min<sup>-1</sup> and maintained for 1 h, then cool down to the room temperature. The obtained NPC samples were named as NPC<sub>(1/2)</sub>, NPC<sub>(1/3)</sub>, NPC<sub>(1/5)</sub> and NPC<sub>(1/7)</sub> correspondingly.

**Characterization of Catalysts.** X-ray diffraction (XRD) data were measured on a Bruke D8 diffractometer (Bruke, Germany) with Cu Ka ( $k = 1.5418 \text{ \AA}$ ) radiation (50 kV, 30 mA). Scanning electron microscopy (SEM) images were obtained with an S-4800 (Hitachi, Japan). Transmission electron microscopy (TEM) images were taken on an instrument Tecnai G2-20 (FEI, USA). X-ray photoelectron spectra (XPS) was collected on 250XI spectrometer (Shimadzu, Japan) equipped with an Al Ka (1486.6 eV) irradiation source. Nitrogen (N<sub>2</sub>) adsorption-desorption isotherms were obtained by static N<sub>2</sub> physisorption at 77 k with a Quantachrome Autosorb iQ analyser (Quantachrome, USA). The surface area was measured by using the multipoint Brunauer-Emmett-Teller (BET) method. The pore volume and pore size were

evaluated from desorption branches of the isotherms with the Barrett-Joyner-Halenda (BJH) method. Raman spectra were measured on an inVia confocal Raman microscope (Renishaw, UK) equipped with a He-Ne laser ( $\lambda = 532 \text{ nm}$ ).  $\text{CO}_2$  TPD were taken on AutoChem1 II 2920 as follows, firstly heat to  $650 \text{ }^\circ\text{C}$  by  $10 \text{ }^\circ\text{C min}^{-1}$ , then the sample was activated for 40 min at  $650 \text{ }^\circ\text{C}$ . The samples were subsequently exposed to pulses of  $\text{CO}_2$  until saturation and then purged with helium (He) flow at  $100 \text{ }^\circ\text{C}$  for 1 h. The temperature of the samples was increased to  $600 \text{ }^\circ\text{C}$  at a ramping rate of  $10 \text{ }^\circ\text{C min}^{-1}$ , and the desorbed  $\text{CO}_2$  was detected and collected the data.

**Measurement of catalytic performance.** The methylation of  $\text{CO}_2$  was conducted in presence of 0.25 mmol substrate, 0.5 mmol phenylsilane, 3 ml solvent, 15 mg catalyst and 0.1 MPa  $\text{CO}_2$  (a balloon filled with  $\text{CO}_2$ ) at the temperature of  $75 \text{ }^\circ\text{C}$  for 20 h under vigorous stirring. After the solvents cooling down to room temperature, the conversion and selectivity of products were detected by using HPLC (LC-20AD, Shimadzu, Japan).

The catalyst was recycled by centrifugation, then washed by EtOH for several times and dried at  $80 \text{ }^\circ\text{C}$ . The recycled catalyst was reused under the same reaction conditions for the recyclability tests.

**Computational method and model.** All calculations were performed by using the functional Dmol3 in material studio. The TS (transition state) Search was performed by using the generalized gradient approximation (GGA) with the BP functional in Dmol3 method. The reaction barrier  $E_{(b)}$  was calculated by

$$E_{(b)} = E_{(TS)} - E_{(IS)}$$

Where  $E_{(IS)}$ ,  $E_{(FS)}$ , and  $E_{(TS)}$  represent the energy of the initial state (IS), final state (FS), and transition state (TS), respectively.

## 2. Schemes

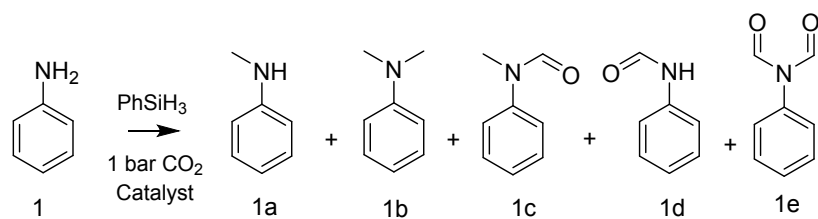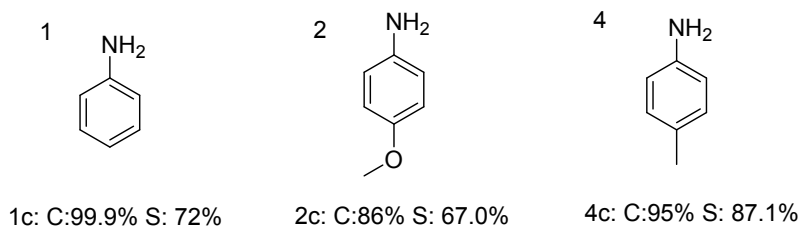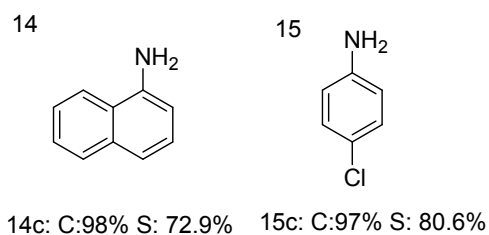

**Scheme S1.** Catalytic reaction of primary amine with  $\text{CO}_2$  by using  $\text{NPC}_{(1/5)}$ .

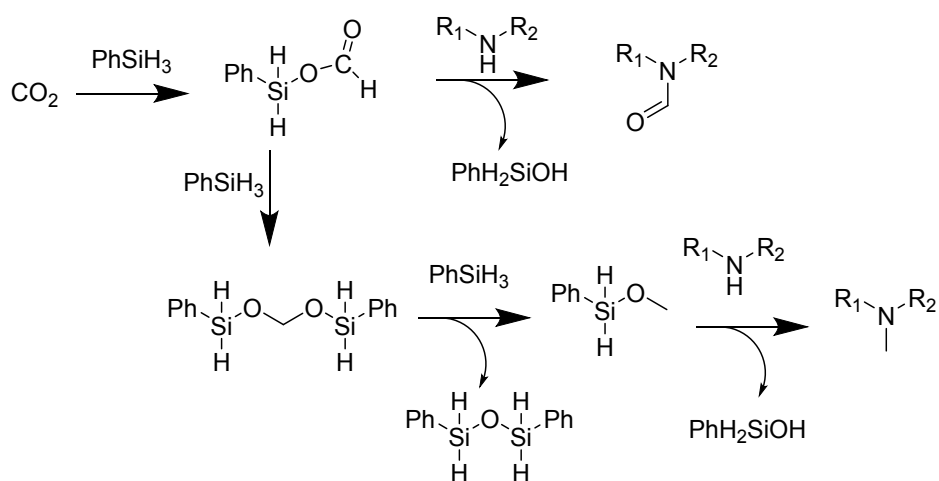

**Scheme S2.** Proposed reaction pathway for  $\text{CO}_2$  conversion.

### 3. Figures

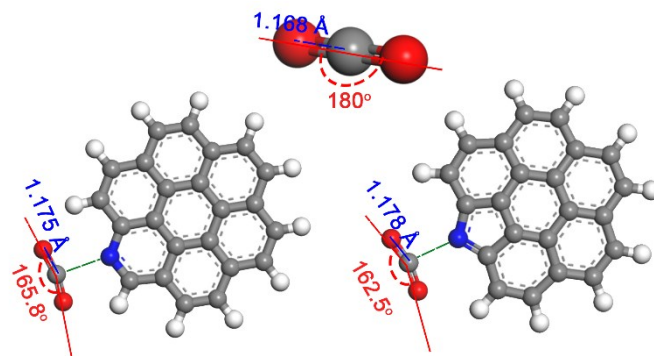

**Fig. S1.** The interaction of CO<sub>2</sub> with pyridinic N and pyrrolic N, respectively.

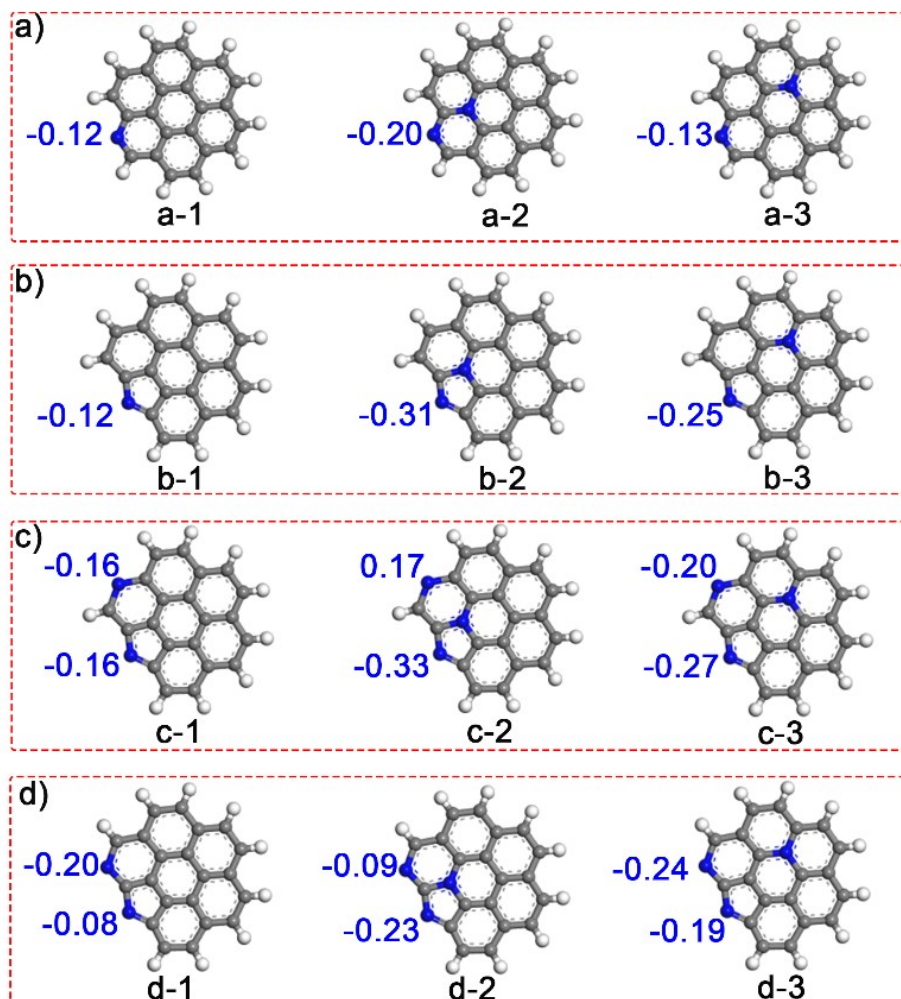

**Fig. S2.** Hirshfeld charge population analysis results of N-species on various simulated NPC models.



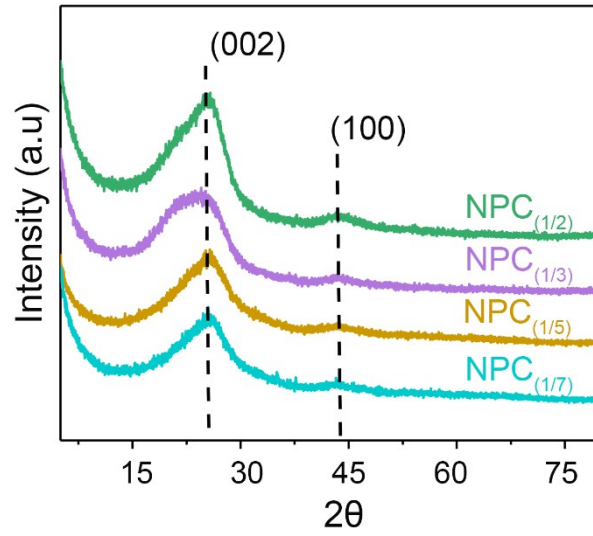

**Fig. S3.** XRD patterns of NPC<sub>(1/2)</sub>, NPC<sub>(1/3)</sub>, NPC<sub>(1/5)</sub> and NPC<sub>(1/7)</sub>.

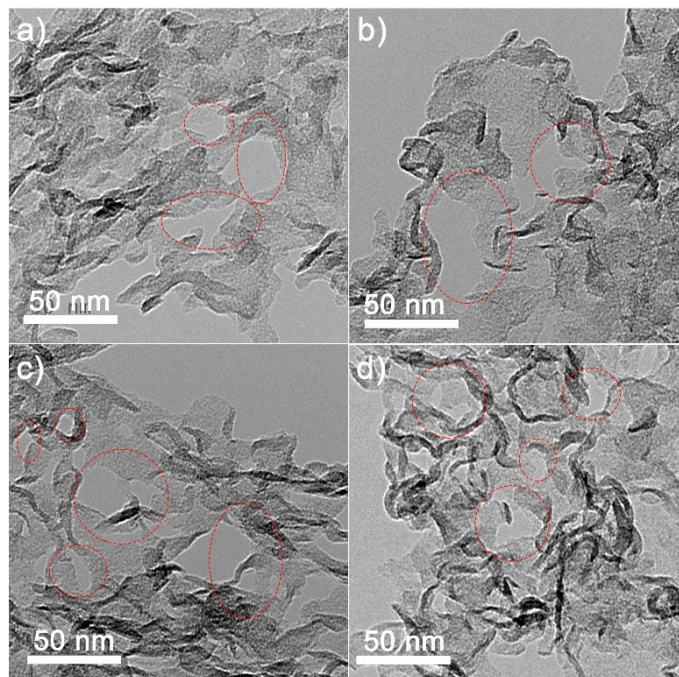

**Fig. S4.** TEM images of a) NPC<sub>(1/2)</sub>, b) NPC<sub>(1/3)</sub>, c) NPC<sub>(1/5)</sub> and d) NPC<sub>(1/7)</sub>.

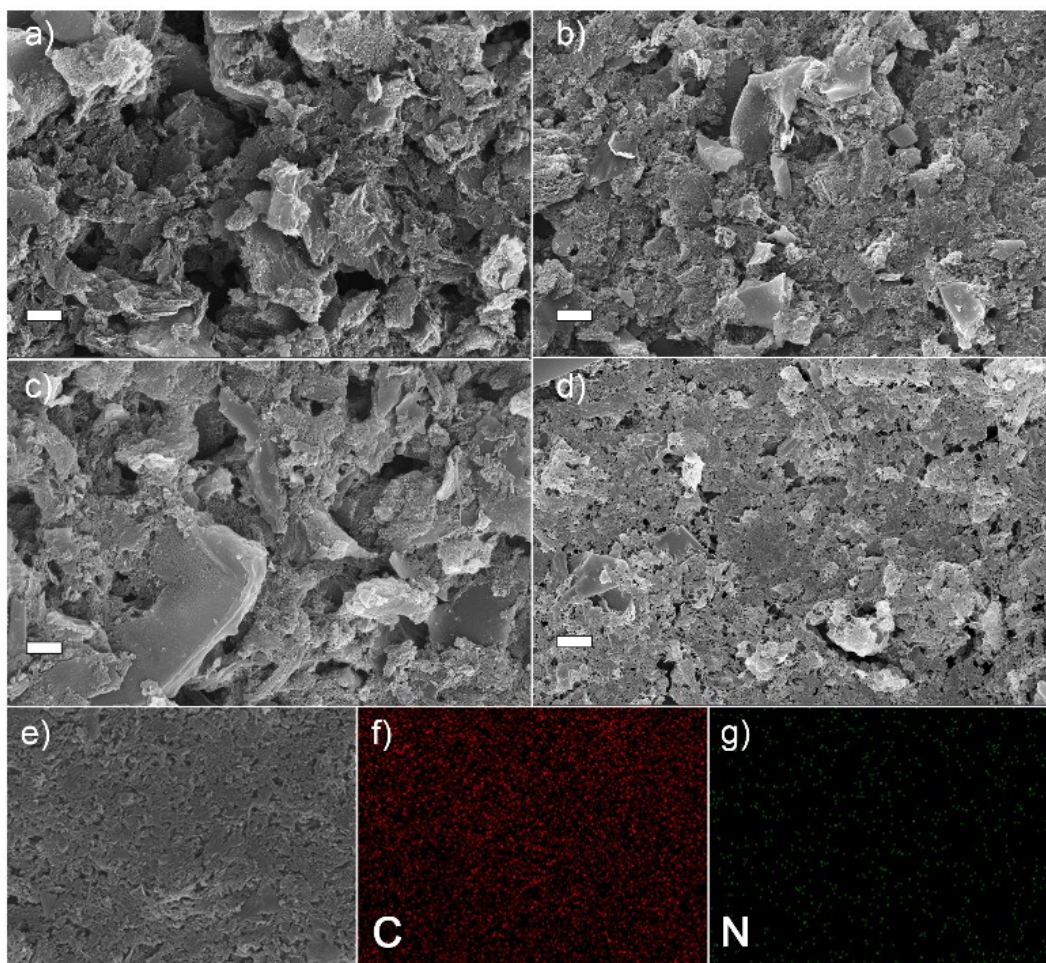

**Fig. S5.** SEM images of a) NPC<sub>(1/2)</sub>, b) NPC<sub>(1/3)</sub>, c) NPC<sub>(1/5)</sub> and d) NPC<sub>(1/7)</sub>. e) SEM image of NPC<sub>(1/5)</sub> and the corresponding EDX mapping of f) C and g) N elements. Scale bar: 200 nm.

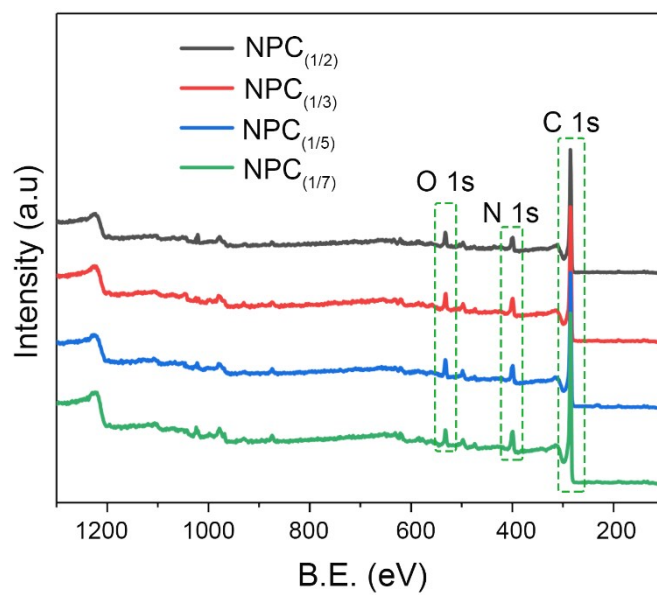

**Fig. S6.** XPS survey spectra of NPC<sub>(1/2)</sub>, NPC<sub>(1/3)</sub>, NPC<sub>(1/5)</sub> and NPC<sub>(1/7)</sub>.

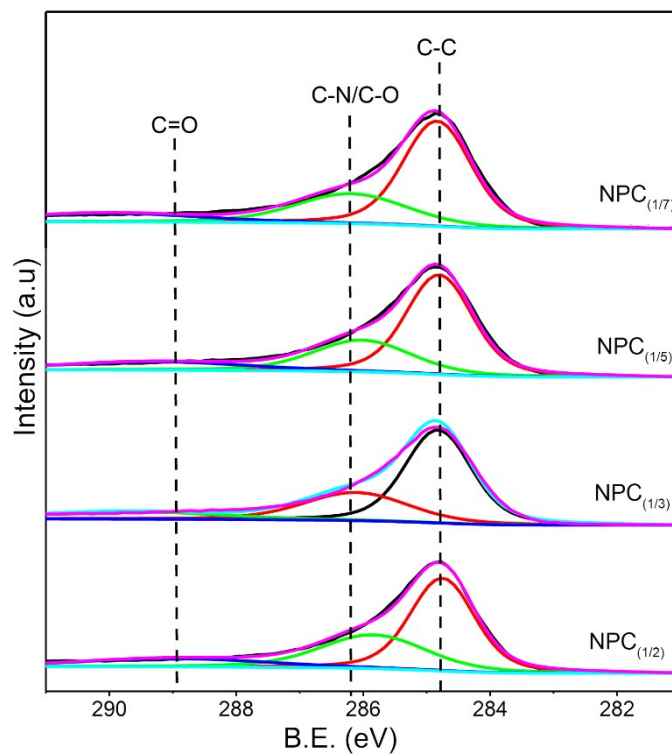

**Fig. S7.** C 1s XPS spectra of NPC<sub>(1/2)</sub>, NPC<sub>(1/3)</sub>, NPC<sub>(1/5)</sub> and NPC<sub>(1/7)</sub>.

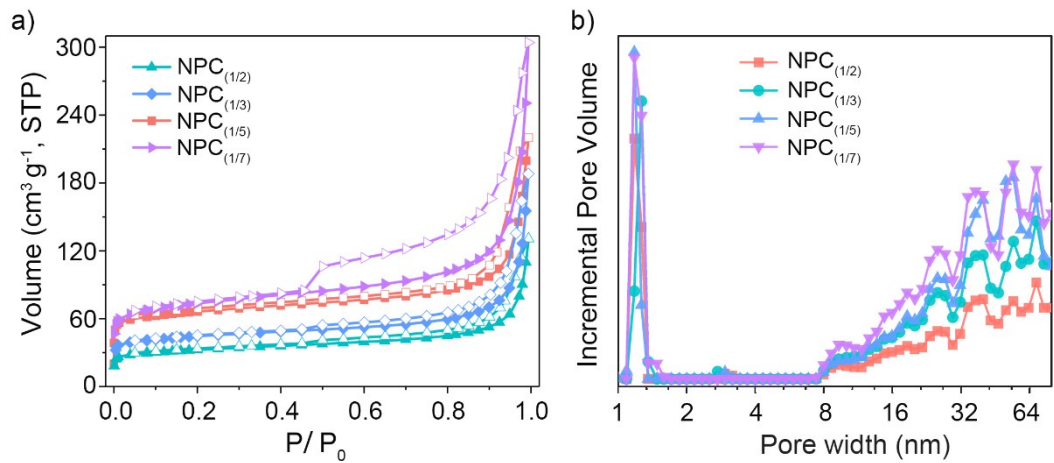

**Fig. S8.** a) N<sub>2</sub> Adsorption (filled symbols)/desorption (empty symbols) isotherms and b) Pore size distribution for NPC<sub>(1/2)</sub>, NPC<sub>(1/3)</sub>, NPC<sub>(1/5)</sub> and NPC<sub>(1/7)</sub>.

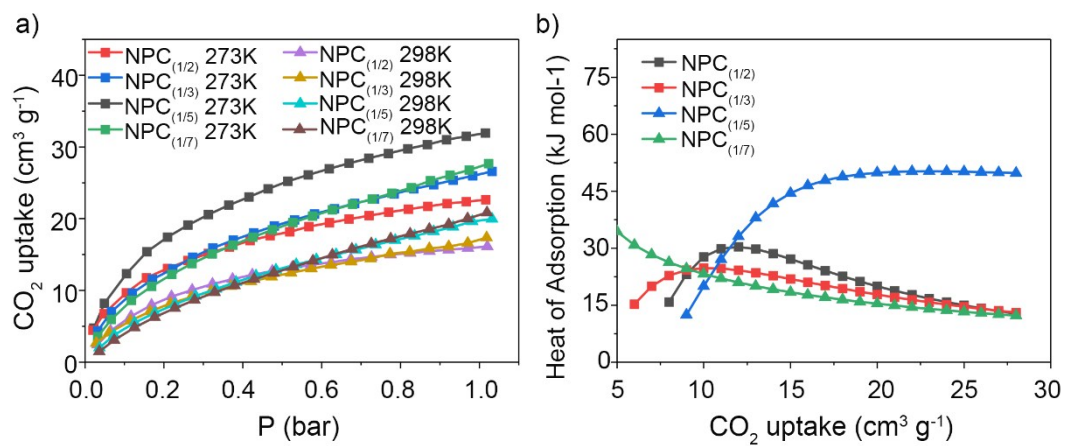

**Fig. S9.** a) CO<sub>2</sub> adsorption (273 K and 298 K) and b) heat of adsorption of NPC<sub>(1/2)</sub>, NPC<sub>(1/3)</sub>, NPC<sub>(1/5)</sub> and NPC<sub>(1/7)</sub>.



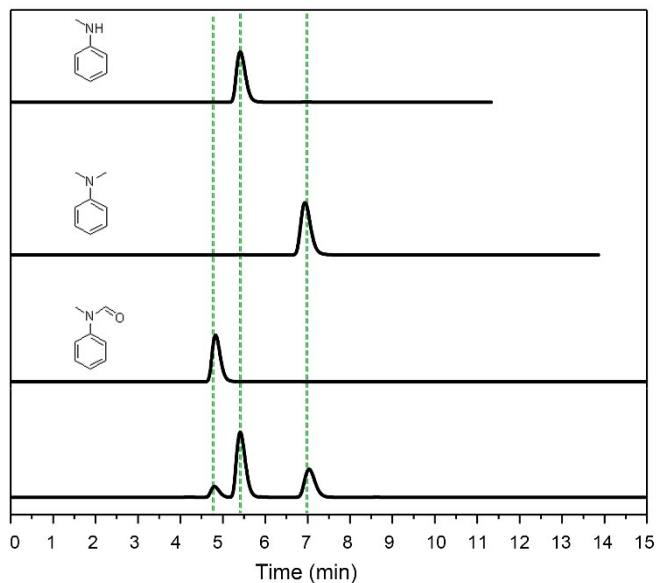

**Fig. S10.** The HPLC spectra of N-methylaniline, N, N-dimethylaniline, N-methylformanilide and the mixture under reaction. The reaction mixture was analyzed via HPLC. The mobile phase is CH<sub>3</sub>OH/H<sub>2</sub>O (0.18/0.62, v/v). The retention time of N-methylaniline, N, N-dimethylaniline and N-methylformanilide are 5.42, 6.93 and 4.81 min, respectively.

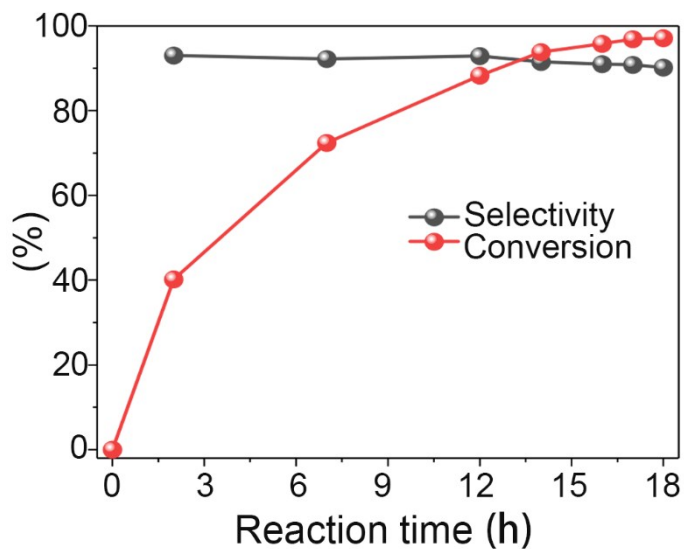

**Fig. S11.** The kinetic data on the methylation reaction over NPC<sub>(1/5)</sub>.

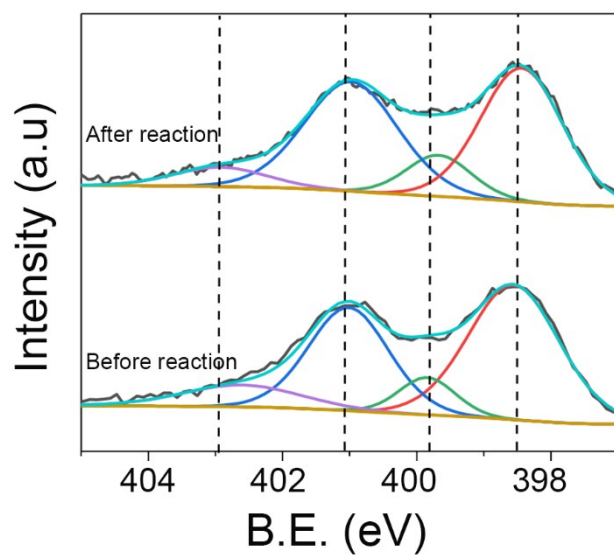

**Fig. S12.** XPS analysis on NPC<sub>(1/5)</sub> before and after the reaction.

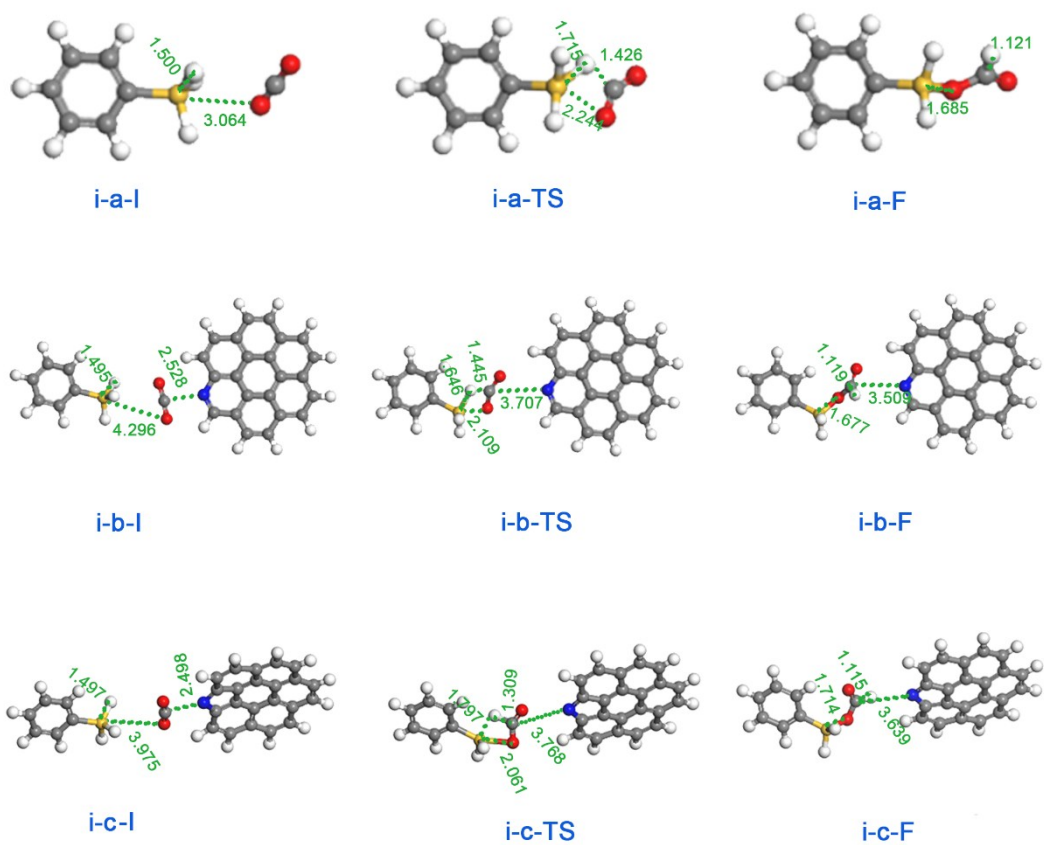

**Fig. S13.** Optimized initial state (I), transition state (TS) and final state (F) structures involved in step i. Some selected distances are given in Å.

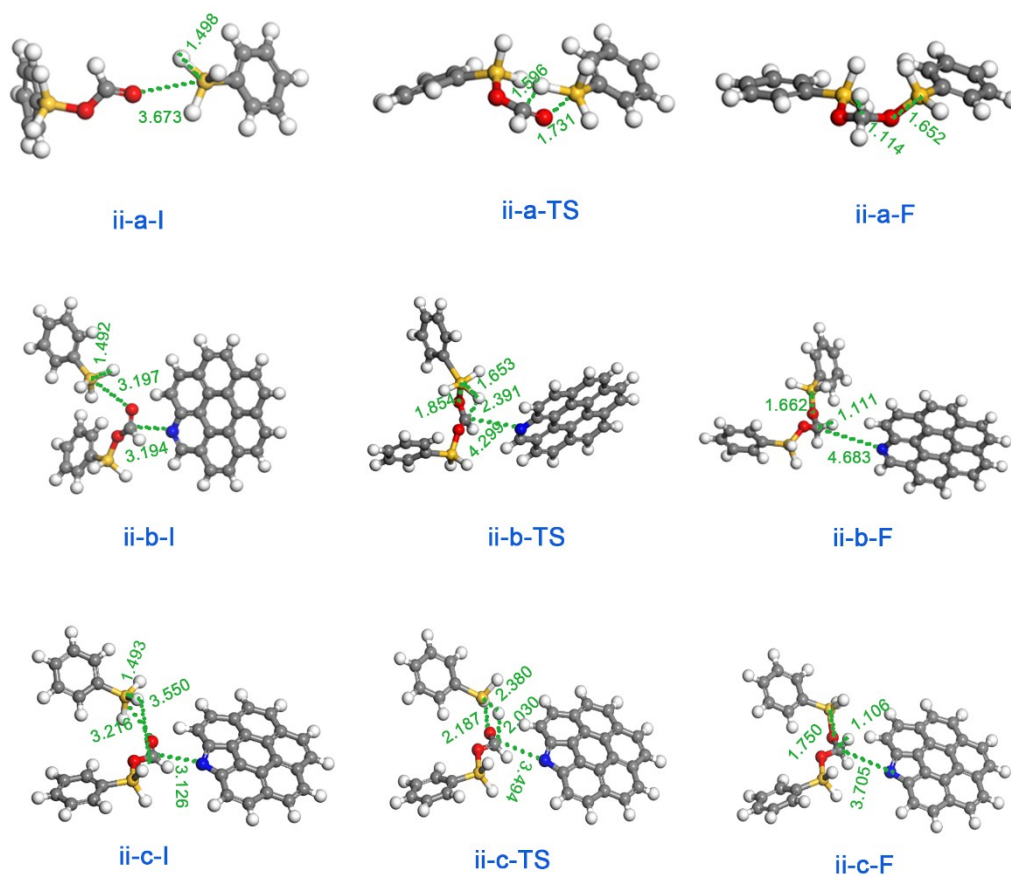

**Fig. S14.** Optimized initial state (I), transition state (TS) and final state (F) structures involved in step ii. Some selected distances are given in Å.



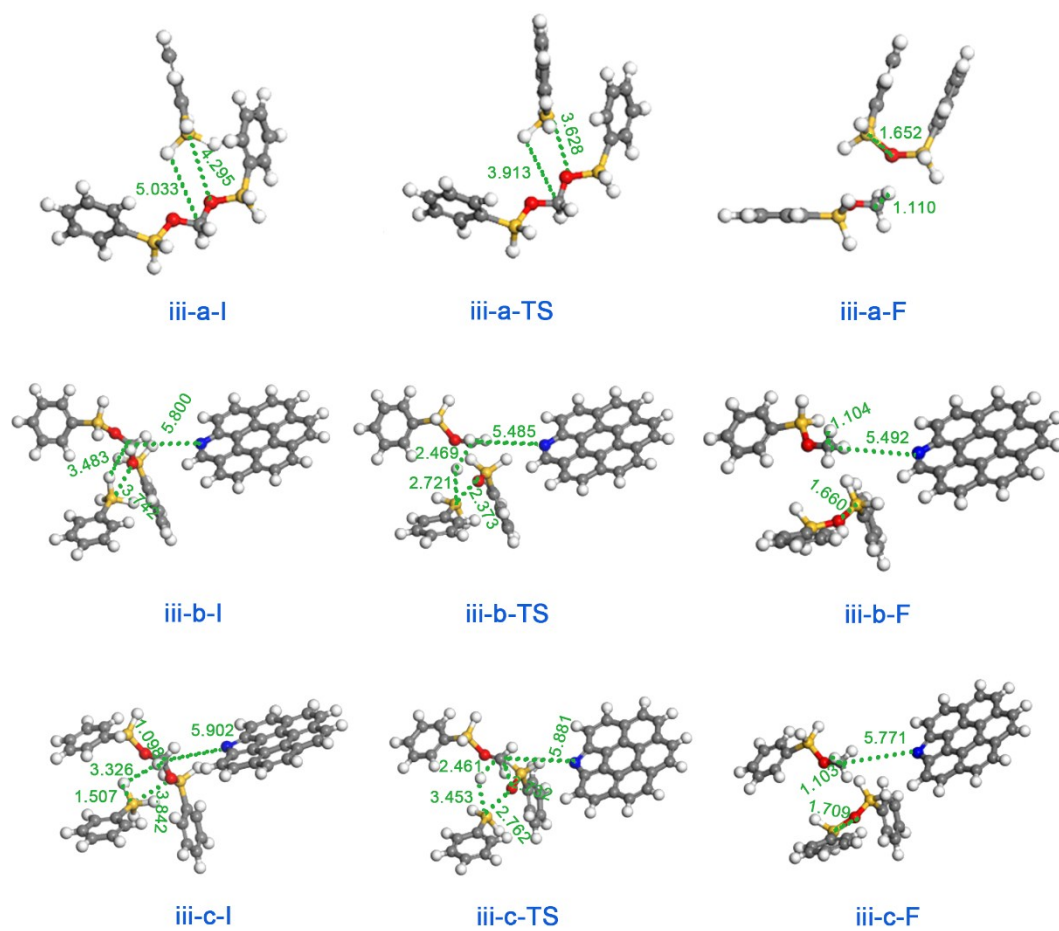

**Fig. S15.** Optimized initial state (I), transition state (TS) and final state (F) structures involved in step iii. Some selected distances are given in Å.

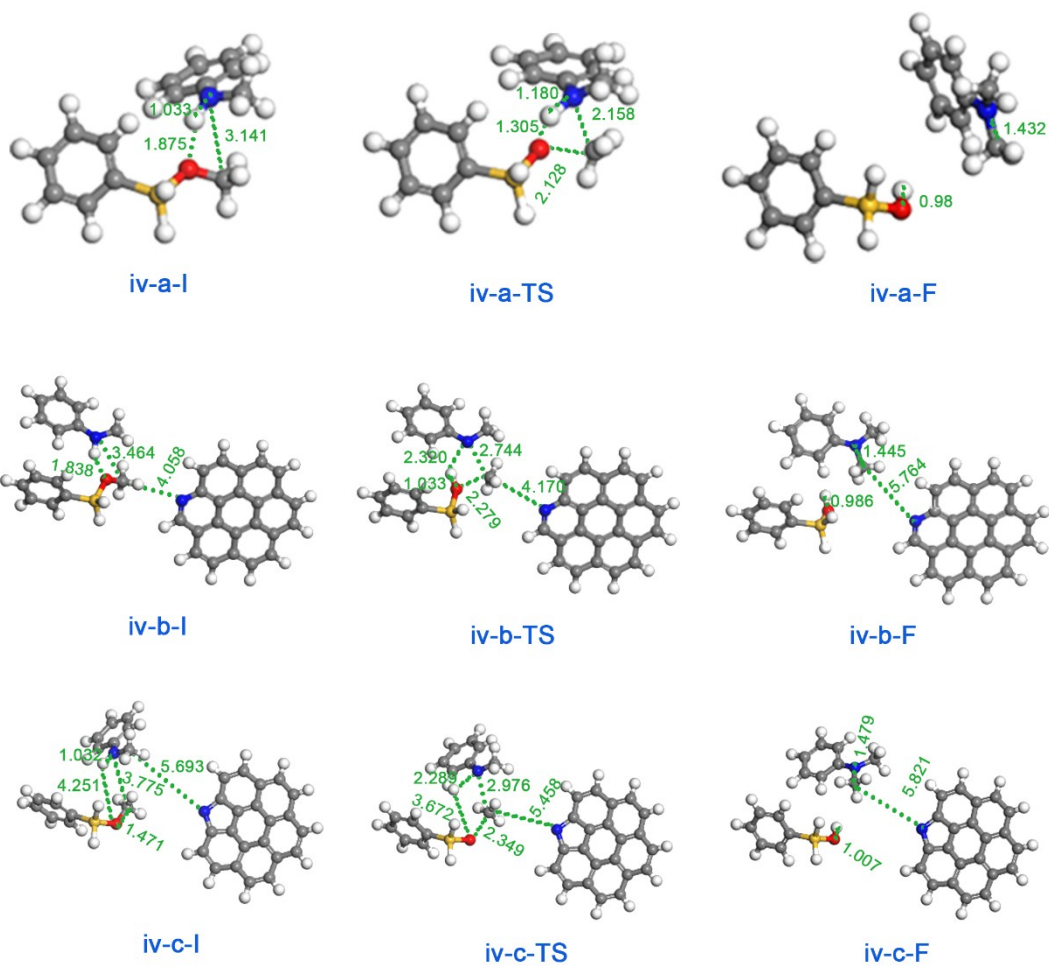

**Fig. S16.** Optimized initial state (I), transition state (TS) and final state (F) structures involved in step iv. Some selected distances are given in Å.

## 4. Tables

**Table S1.** Summary of N 1s XPS results for NPC samples.

| Sample               | Total N (at%) | Pyrrole-like-N (at%) | Pyridinic N (at%) | Graphitic N (at%) | Pyridine-N-oxide (at%) |
|----------------------|---------------|----------------------|-------------------|-------------------|------------------------|
| NPC <sub>(1/2)</sub> | 7.6           | 0.5                  | 3.6               | 3.1               | 0.4                    |
| NPC <sub>(1/3)</sub> | 7.8           | 0.5                  | 3.1               | 3.4               | 0.8                    |
| NPC <sub>(1/5)</sub> | 8.2           | 0.7                  | 4.0               | 2.7               | 0.8                    |
| NPC <sub>(1/7)</sub> | 8.3           | 0.5                  | 3.8               | 3.5               | 0.5                    |

**Table S2.** Summary of surface areas and pore volumes for all NPC samples.

| Sample               | $S_{\text{BET}}^{\text{a}}$ | $S_{\text{micro}}^{\text{b}}$ | $S_{\text{meso}}^{\text{c}}$ | $V_{\text{total}}^{\text{d}}$ | $V_{\text{micro}}^{\text{e}}$ |
|----------------------|-----------------------------|-------------------------------|------------------------------|-------------------------------|-------------------------------|
| NPC <sub>(1/2)</sub> | 107.6                       | 56.5                          | 51.1                         | 0.20                          | 0.05                          |
| NPC <sub>(1/3)</sub> | 146.5                       | 84.5                          | 62.0                         | 0.28                          | 0.06                          |
| NPC <sub>(1/5)</sub> | 216.8                       | 135.8                         | 81.0                         | 0.33                          | 0.10                          |
| NPC <sub>(1/7)</sub> | 242.8                       | 137.1                         | 105.7                        | 0.46                          | 0.10                          |

Note: <sup>a</sup> Calculated by using the BET model (unit:  $\text{m}^2 \text{g}^{-1}$ ); <sup>b</sup> Cumulative micropore surface area with the pore width less than 2 nm using NLDFT model (unit:  $\text{m}^2 \text{g}^{-1}$ ); <sup>c</sup>  $S_{\text{meso}} = S_{\text{BET}} - S_{\text{micro}}$  (unit:  $\text{m}^2 \text{g}^{-1}$ ); <sup>d</sup>  $V_{\text{total}}$ : total volume (unit :  $\text{cm}^3 \text{g}^{-1}$ ), calculated at  $P/P_0 = 0.99$ ; <sup>e</sup>  $V_{\text{micro}}$ : Micropore volume (unit :  $\text{cm}^3 \text{g}^{-1}$ ), calculated from NLDFT.

**Table S3.** Catalytic performance of NPC<sub>(1/5)</sub> in different solvents.

| Entry | Catalyst             | Solvent            | $P_{\text{CO}_2}$ (bar) | $T$ (°C) | $t$ (h) | $C$ (%) | $S$ (%) |      |
|-------|----------------------|--------------------|-------------------------|----------|---------|---------|---------|------|
|       |                      |                    |                         |          |         |         | 1b      | 1c   |
| 1     | NPC <sub>(1/5)</sub> | CH <sub>3</sub> OH | 1                       | 75       | 18      | Trace   | –       | –    |
| 2     | NPC <sub>(1/5)</sub> | 1,4-dioxane        | 1                       | 75       | 18      | 63.1    | 88.0    | 12.0 |
| 3     | NPC <sub>(1/5)</sub> | CH <sub>3</sub> CN | 1                       | 75       | 18      | 80.1    | 83.9    | 16.1 |
| 4     | NPC <sub>(1/5)</sub> | DMSO               | 1                       | 75       | 18      | 67.8    | 87.0    | 13.0 |
| 5     | NPC <sub>(1/5)</sub> | DMF                | 1                       | 75       | 18      | 97.1    | 90.2    | 9.8  |
| 6     | NPC <sub>(1/5)</sub> | THF                | 1                       | 75       | 18      | 56.8    | 84.4    | 15.6 |
| 7     | –                    | CH <sub>3</sub> OH | 1                       | 75       | 18      | Trace   | –       | –    |
| 8     | –                    | 1,4-dioxane        | 1                       | 75       | 18      | Trace   | –       | –    |
| 9     | –                    | CH <sub>3</sub> CN | 1                       | 75       | 18      | 2.1     | 83.0    | 17.0 |
| 10    | –                    | DMSO               | 1                       | 75       | 18      | 37.8    | 86.2    | 13.8 |
| 11    | –                    | DMF                | 1                       | 75       | 18      | 64.1    | 78.9    | 21.1 |
| 12    | –                    | THF                | 1                       | 75       | 18      | Trace   | –       | –    |
| 13    | Pyridine             | THF                | 1                       | 75       | 18      | 32.6    | 78.1    | 21.9 |
| 14    | Pyrrole              | THF                | 1                       | 75       | 18      | Trace   | –       | –    |

Reaction condition: 1a (0.25 mmol), PhSiH<sub>3</sub> (0.5 mmol), catalyst (15 mg), solvent (3 mL); Conversion rate ( $C$ ) and Selectivity ( $S$ ) were determined by HPLC.

**Table S4.** The Methylation reaction of N-methylaniline with CO<sub>2</sub> over our proposed NPC catalysts and recently documented homogenous catalysts.

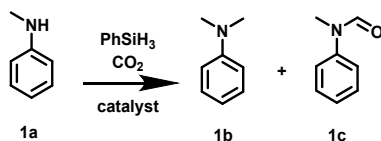

| Catalyst                                                                                                | CO <sub>2</sub><br>(bar) | T<br>(°C) | Conversion of<br>1b (%) | Yield of 1b<br>(%) | Selectivity of<br>1b (%) |
|---------------------------------------------------------------------------------------------------------|--------------------------|-----------|-------------------------|--------------------|--------------------------|
| DBU <sup>1</sup>                                                                                        | 1                        | 100       | –                       | 88.0               | –                        |
| NHC B <sup>2</sup>                                                                                      | 1                        | 50        | –                       | 84.0               | –                        |
| GB <sup>3</sup>                                                                                         | 1                        | 70        | >99.0                   | 91.0               | –                        |
| DMF <sup>4</sup>                                                                                        | 1                        | 90        | –                       | 80.0               | –                        |
| [RhCl{C(NCH <sub>2</sub> PCy <sub>2</sub> ) <sub>2</sub> C <sub>10</sub> H <sub>6</sub> }] <sup>5</sup> | 1                        | 90        | 98.0                    | 93.0               | –                        |
| Mn <sub>2</sub> (CO) <sub>10</sub> /L1 <sup>6</sup>                                                     | 1                        | 100       | –                       | 87.0               | –                        |
| Cu <sub>2</sub> (OH) <sub>2</sub> CO <sub>3</sub> /DPPB <sup>7</sup>                                    | 1                        | 60        | 93.0                    | 88.0               | 95.0                     |
| [RuCl <sub>2</sub> (dmsO) <sub>4</sub> /nBuPAD <sub>2</sub> ] <sup>8</sup>                              | 30                       | 100       | –                       | 98.0               | –                        |
| CsCO <sub>3</sub> <sup>9</sup>                                                                          | 4                        | 80        | –                       | 71.0               | –                        |
| COF-HNU3 <sup>10</sup>                                                                                  | 1                        | 30        | –                       | 96                 | 99                       |
| Gibeon meteorite <sup>11</sup>                                                                          | 10                       | 100       | –                       | 96                 | –                        |
| This work                                                                                               | 1                        | 75        | 97.1                    | 87.6               | 90.2                     |

**Table S5.** Summary of N 1s XPS results for NPC(1/5) before and after reaction.

| Sample | Total N<br>(at%) | Pyrrole-like-N<br>(at%) | Pyridinic N<br>(at%) | Graphitic N<br>(at%) | Pyridine-N-oxide<br>(at%) |
|--------|------------------|-------------------------|----------------------|----------------------|---------------------------|
| Before | 8.2              | 0.7                     | 4.0                  | 2.7                  | 0.8                       |
| After  | 8.4              | 0.8                     | 3.9                  | 3.1                  | 0.6                       |

## Reference

1. G. Li, J. Chen, D.-Y. Zhu, Y. Chen and J.-B. Xia, *Adv. Synth. Catal.*, 2018, 360, 2364-2369.
2. S. Das, F. D. Bobbink, G. Laurenczy and P. J. Dyson, *Angew. Chem. Int. Ed.*, 2014, 53, 12876-12879.
3. X. F. Liu, X. Y. Li, C. Qiao, H. C. Fu and L. N. He, *Angew. Chem. Int. Ed.*, 2017, 56, 7425-7429.
4. H. Niu, L. Lu, R. Shi, C. W. Chiang and A. Lei, *Chem. Commun.*, 2017, 53, 1148-1151.
5. R. H. Lam, C. M. A. McQueen, I. Pernik, R. T. McBurney, A. F. Hill and B. A. Messerle, *Green Chem.*, 2019, 21, 538-549.
6. Z. Huang, X. Jiang, S. Zhou, P. Yang, C. X. Du and Y. Li, *ChemSusChem*, 2019, 12, 3054-3059.
7. X.-D. Li, S.-M. Xia, K.-H. Chen, X.-F. Liu, H.-R. Li and L.-N. He, *Green Chem.*, 2018, 20, 4853-4858.
8. Y. Li, X. Fang, K. Junge and M. Beller, *Angew. Chem. Int. Ed.*, 2013, 52, 9568-9571.
9. C. Fang, C. Lu, M. Liu, Y. Zhu, Y. Fu and B.-L. Lin, *ACS Catal*, 2016, 6, 7876-7881.
10. J. Qiu, Y. Zhao, Z. Li, H. Wang, Y. Shi, J. Wang, *ChemSusChem* 2019, 12, 2421-2427.
11. A. Gopakumar, I. Akçok, L. Lombardo, F. Le Formal, A. Magrez, K. Sivula, P. J. Dyson, *ChemistrySelect* 2018, 3, 10271-10276.
